# Supplementary material
Source: PubMed Central journal article supplement (PMC4731110)
Supplement: ASN.2014100998_ASN2014100998SupplementaryData.pdf [file ASN.2014100998_ASN2014100998SupplementaryData.pdf]

**Supplementary Table 1.** Primers (from 5' to 3') for synthesizing antisense cRNA probes or for quantitative PCR and ChIP PCR.

| In situ probes                 | Forward primer           | Reverse primer            | Notes         |
|--------------------------------|--------------------------|---------------------------|---------------|
| <i>Bmp4</i>                    | TGGTAACCGAATGCTGATGG     | GATGGCATGGTTGGTTGAGTTG    | Exon 3-4      |
| <i>Bmp7</i>                    | AACGAGGTGCACTCCAGC       | TCTTGGAGCGATTCTGGC        | Genepaint.org |
| <i>Fgfr2</i>                   | CACCAACTGCACCAATGAAC     | CAGCATACATGGTGGGTCAG      | Exon 14-16    |
| <i>GDNF</i>                    | CTTGGCCTTCTGATCCTCTG     | CCTGCACAGTTCCTATGT        | Exon 3        |
| <i>GFR<math>\alpha</math>1</i> | AAGTCCCTGGTCACATCCAG     | TATCTCCATCCCAGCCAGTC      | Exon 11       |
| <i>Lim1</i>                    | ATCTCTCCAAGCGATCTGGTTCGC | TCTCTGTACAACCACGAGCTCC    | Exon 2-5      |
| <i>Pax2</i>                    | TATGCACTGCAAAGCAGACC     | GAAAGGCTGCTGAACTTTGG      | Exon 1-4      |
| <i>Pax8</i>                    | AAGGAAGAGACGCCTGGGCCTTGG | CACTCAAGGGCCTCGAGATGGTGC  | Exon 1-7      |
| <i>Ret</i>                     | ATCTGGGGAGGGAGTCAGTT     | GAACCCTCTAGGGGCTGTTC      | Exon 19       |
| <i>Wnt4</i>                    | GCCGCGAGCAATTGGCTGTACC   | GCATGTGTGTCAAGATGGCCTT    | Exon 1-5      |
| <i>Wnt9b</i>                   | TGTGTGTGGTGACAATCTGAA    | AGGCCTAGCGCTTGCAG         | Genepaint.org |
| <i>Wnt11</i>                   | ACCTGCTTGACCTGGAGAGA     | ACCACTCTGTCCGTGTAGGG      | Exon 4-7      |
| <b>Q-PCR</b>                   |                          |                           |               |
| <i>Ret</i>                     | GCATGTCAGACCCGAACTGG     | CGCTGAGGGTGAAACCATCC      | Exon 20       |
| <i>Lrp6</i>                    | ACGGGACTTGAGATTGGTTG     | CGGGGACAATAATCCAGAAA      | Exon 2        |
| <i>GAPDH</i>                   | TGCTGAGTATGTCGTGGAGTCT   | CATATTTCTCGTGGTTCACACC    | Exon 3-4      |
| <b>ChIP</b>                    |                          |                           |               |
| <i>Ret R1</i>                  | GGAGAGTTCGATTCTTCTGGCA   | GTTTGTGATTCCCAGGACCGGT    |               |
| <i>Ret R2</i>                  | CAGGGGAAACTGAGGTTCAAGGC  | GTCTCCCTGTACCTAGGGCAGGT   |               |
| <i>Ret R3</i>                  | CCCATGTCCACTCTGAGGGAC    | ACCTGGAGCCCCCTTGAGTCTTGCT |               |
| <i>Ret R4</i>                  | GCCTCTTCTAGGTTAGAAGGCTG  | AGTATGCAGAGCCCCACCCTCCTG  |               |
